# Supplementary material for: Elastic strain-induced amorphization in high-entropy alloys
Source: PubMed Central journal article supplement (PMC11139900; doi:10.1038/s41467-024-48619-0), 2024-05-30
Supplement: 41467_2024_48619_MOESM3_ESM.pdf [file 41467_2024_48619_MOESM3_ESM.pdf]

**Caption for Supplementary Movie 1.**

**Supplementary Movie 1.**

*In situ* process revealing the amorphization of nanoscale TiHfZrNb.
